# Supplementary material for: Compulsory community treatment to reduce readmission to hospital and increase engagement with community care in people with mental illness: a systematic review and meta-analysis
Source: PubMed Central journal article supplement (PMC6251967; doi:10.1016/s2215-0366(18)30382-1), 2018-12
Supplement: mmc1.pdf [file mmc1.pdf]

# THE LANCET Psychiatry

## Supplementary appendix

This appendix formed part of the original submission and has been peer reviewed. We post it as supplied by the authors.

Supplement to: Barnett P, Matthews H, Lloyd-Evans B, Mackay E, Pilling S, Johnson S. Compulsory community treatment to reduce readmission to hospital and increase engagement with community care in people with mental illness: a systematic review and meta-analysis. *Lancet Psychiatry* 2018; published online Oct 31. [http://dx.doi.org/10.1016/S2215-0366\(18\)30382-1](http://dx.doi.org/10.1016/S2215-0366(18)30382-1).

## Literature Search: Community Treatment Orders

Database(s) Ovid XSearch: **PsycINFO** 1806 to December Week 4 2017, **Embase** 1974 to 2018 Week 01, **Ovid MEDLINE(R) Epub Ahead of Print, In-Process & Other Non-Indexed Citations, Ovid MEDLINE(R) Daily and Ovid MEDLINE(R)** 1946 to 4 January 2018

Search Strategy:

| #  | Searches                                                                                                                                                                                             | Results |
|----|------------------------------------------------------------------------------------------------------------------------------------------------------------------------------------------------------|---------|
| 1  | community treatment order?.ti,ab,kf,kw,id.                                                                                                                                                           | 853     |
| 2  | ((CTO or CTOs) adj5 (psychiatr* or mental or SMI or psycho* or schizo* or manic or mania or bipolar or antipsycho* or anti-psycho*)).ti,ab,kf,kw,id.                                                 | 128     |
| 3  | ((((CTO or CTOs) and community) not chronic total occlusion?).ti,ab,kf,kw,id.                                                                                                                        | 481     |
| 4  | ((involuntary or in-voluntary or compulsory or mandatory or mandate?) adj (outpatient? or out-patient? or community treatment)).ti,ab,kf,kw,id.                                                      | 783     |
| 5  | ((outpatient? or out-patient?) adj commit*).ti,ab,kf,kw,id.                                                                                                                                          | 680     |
| 6  | ((((involuntary or in-voluntary or compulsory or mandatory or mandate?) adj3 commit*) and (community or outpatient? or out-patient?)).ti,ab,kf,kw,id,sh.                                             | 562     |
| 7  | ((assisted or supervised) adj (outpatient? or out-patient? or community) adj treatment?).ti,ab,kf,kw,id.                                                                                             | 220     |
| 8  | ((conditional adj (release? or discharge?)) and hospital* and (psychiatr* or mental or SMI or psycho* or schizo* or manic or mania or bipolar or antipsycho* or anti-psycho*)).ti,ab,kf,kw,id,jw,hw. | 245     |
| 9  | ((court adj2 order*) and community and (psychiatr* or mental or SMI or psycho* or schizo* or manic or mania or bipolar or antipsycho* or anti-psycho*)).ti,ab,kf,kw,id,sh.                           | 223     |
| 10 | (civil commitment and (outpatient? or out-patient? or OPC)).ti,ab,kf,kw,id.                                                                                                                          | 204     |
| 11 | OUTPATIENT COMMITMENT/ use psych                                                                                                                                                                     | 195     |
| 12 | (COMMUNITY MENTAL HEALTH and (COMMITMENT or COURT REFERRAL?)).hw.                                                                                                                                    | 739     |
| 13 | INVOLUNTARY COMMITMENT/ and (COMMUNITY CARE/ or OUTPATIENT CARE/)                                                                                                                                    | 327     |
| 14 | "COMMITMENT (PSYCHIATRIC)"/                                                                                                                                                                          | 1589    |
| 15 | (OUTPATIENT? or COMMUNITY).hw.                                                                                                                                                                       | 651427  |
| 16 | 14 and 15                                                                                                                                                                                            | 84      |
| 17 | or/1-13,16                                                                                                                                                                                           | 3192    |

|    |                           |      |
|----|---------------------------|------|
| 18 | remove duplicates from 17 | 1832 |
|----|---------------------------|------|

ProQuest Dissertations & Theses Global  
 Search: “*community treatment order\**” *n=98*

## Comparison with search terms used by other authors

Search terms highlighted in bold (below) were replicated in the new search, however the acronym *CTO* was qualified (please see lines 2 and 3 (above)) and *IOT*, *AOT* were not used. The phrase ‘*involuntary commitment*’ was also qualified to *community* or *outpatients*. Other synonyms/variant spellings were appended to the new search (where appropriate), (terms not used by the other authors). The new search finds all of the studies included in the other reviews, bar a few references cited by Churchill 2007 (details below).

### KISLEY 2017

Kisely S, Campbell LA, O’Reilly R. Compulsory community and involuntary outpatient treatment for people with severe mental disorders. The Cochrane database of systematic reviews. 2017(3):CD004408. DOI: 10.1002/14651858.CD004408.pub5

Search: Cochrane Schizophrenia Group’s Specialised Register:  
 Studies, Intervention field = (*\*involuntary\* or \*treatment order\* or \*outpatient commitment\**)

### RUGKAS 2016 and MAUGHAN 2014

Rugkasa J. Effectiveness of Community Treatment Orders: The International Evidence. Canadian journal of psychiatry Revue canadienne de psychiatrie. 2016;61(1):15-24.

Maughan D, Molodynski A, Rugkasa J, Burns T. A systematic review of the effect of community treatment orders on service use. Social psychiatry and psychiatric epidemiology. 2014;49(4):651-63

Search terms:

**community treatment orders**

*CTO*

**mandatory outpatient**

**involuntary outpatient**

**outpatient commitment**

*involuntary commitment*

*IOT*

**assisted outpatient treatment**

## CHURCHILL 2007

Churchill R, Owen G, Swaran S, Hotopf M. International experiences of using community treatment orders. London: Institute of Psychiatry, 2007.

Database: EMBASE, Ovid MEDLINE(R), PsycINFO

Search Strategy:

- 
- 1 **(community adj treatment adj order\$)**.mp. [mp=ti, ab, sh, hw, tn, ot, dm, mf, nm, tc, id]
  - 2 **CTO\$**.mp. [mp=ti, ab, sh, hw, tn, ot, dm, mf, nm, tc, id]
  - 3 **(mandat\$ adj outpatient)**.mp. [mp=ti, ab, sh, hw, tn, ot, dm, mf, nm, tc, id]
  - 4 **(outpatient\$ adj commitment)**.mp. [mp=ti, ab, sh, hw, tn, ot, dm, mf, nm, tc, id]
  - 5 **(involuntar\$ adj outpatient\$)**.mp. [mp=ti, ab, sh, hw, tn, ot, dm, mf, nm, tc, id]
  - 6 (involuntar\$ adj commitment\$).mp. [mp=ti, ab, sh, hw, tn, ot, dm, mf, nm, tc, id]
  - 7 **IOT**.mp. [mp=ti, ab, sh, hw, tn, ot, dm, mf, nm, tc, id]
  - 8 **(Assisted adj outpatient adj treatment)**.mp. [mp=ti, ab, sh, hw, tn, ot, dm, mf, nm, tc, id]
  - 9 aot.mp. [mp=ti, ab, sh, hw, tn, ot, dm, mf, nm, tc, id]
  - 10 **((civil adj commitment) and OPC)**.mp. [mp=ti, ab, sh, hw, tn, ot, dm, mf, nm, tc, id]
  - 11 or/1-10

References cited by Churchill, not retrieved by the new search (reports/journals not indexed on MEDLINE, Embase or PsycINFO):

1. New York State Office of Mental Health. Kendra's Law. Final report on the status of assisted outpatient treatment. 2005. New York State Office of Mental Health. New York, NY.
2. Scheid-Cook TL. Controllers and controlled: an analysis of participant constructions of outpatient commitment. *Sociology of Health & Illness* 1993; 15(2):179-198.
3. The Centre for Addiction and Mental Health and the Canadian Mental Health Association. Report on the survey of hospitals' use of community treatment orders and case management services. 2005. Toronto, Ontario, Canada. 2005.
4. Power P. A controlled Study of the clinical effectiveness of community treatment orders in Australia: a 'Mirror-image' analysis. Unpublished. 1992.
5. Rohland BM, Rohrer JE, Richards CC. The long-term effect of outpatient commitment on service use. *Administration & Policy in Mental Health* 2000; 27(6):383-94.
6. Swartz M, Hiday V, Swanson JW, Wagner HR, Borum R, Burns BJ. Measuring coercion under involuntary outpatient commitment: initial findings from a RCT. *Research in the Community and Mental Health* 1999; 10:57-77.

## Meta-analysis: Readmission Rate Ratio

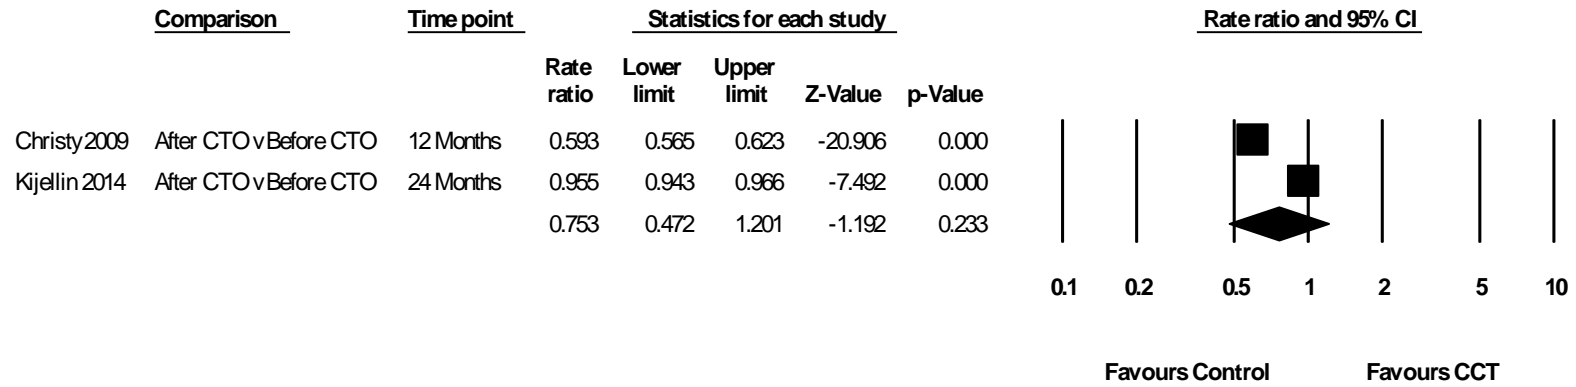

Pre-Post CCT

## Meta-analysis: Readmission Risk Ratio

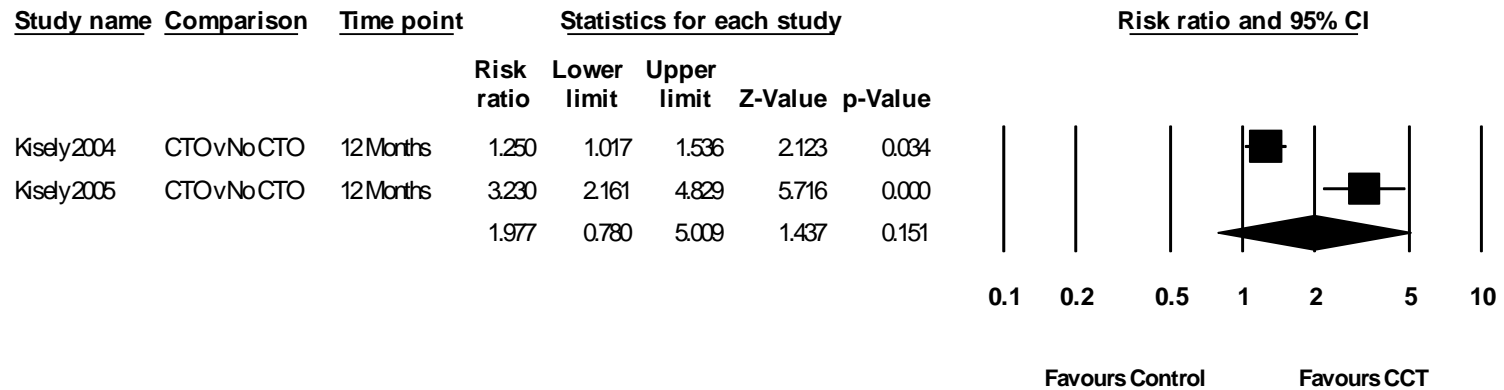

CCT vs Control

# Meta-analysis: Inpatient bed days

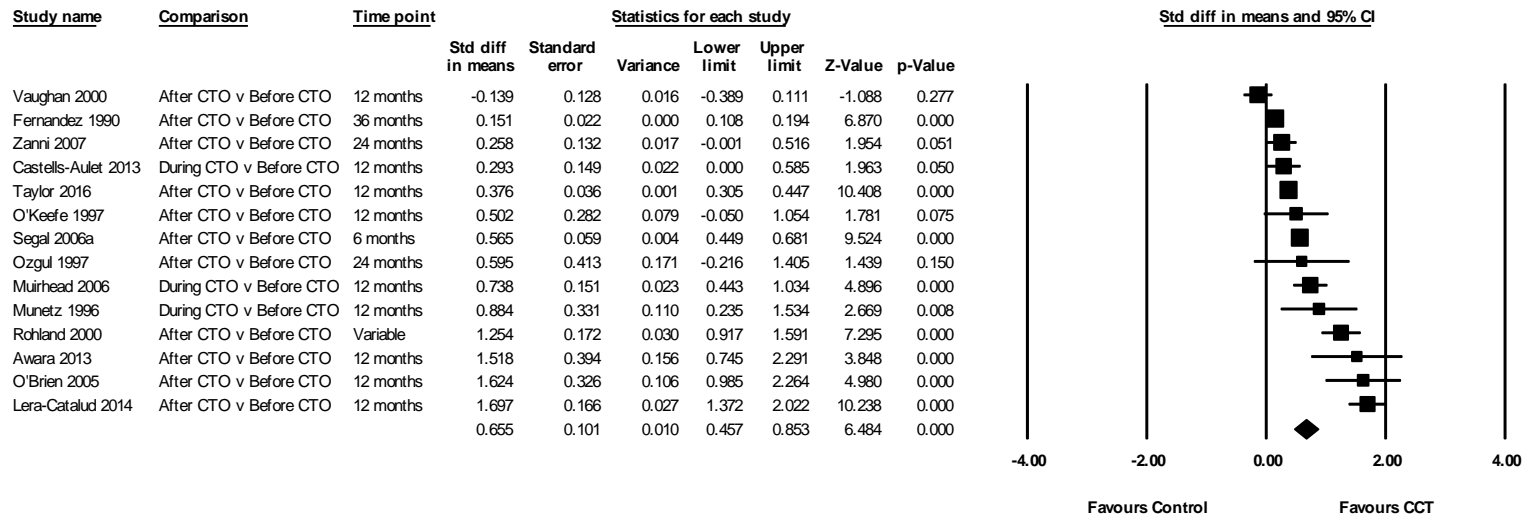

Pre-Post CCT

# Meta-analysis: Inpatient bed days

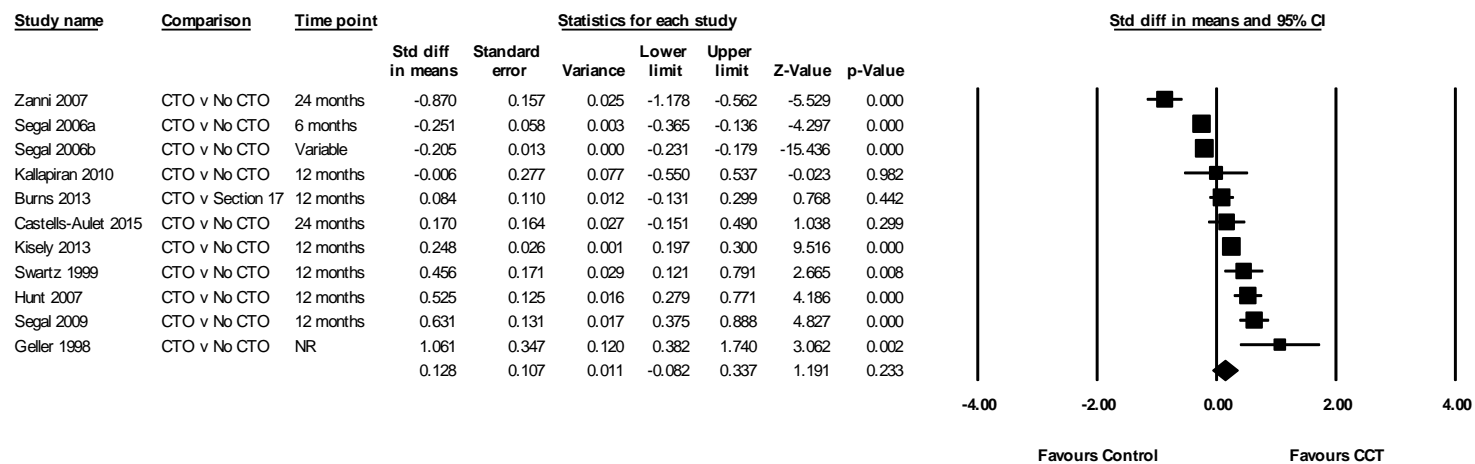

CCT vs Control



## Meta-analysis: Use of community services

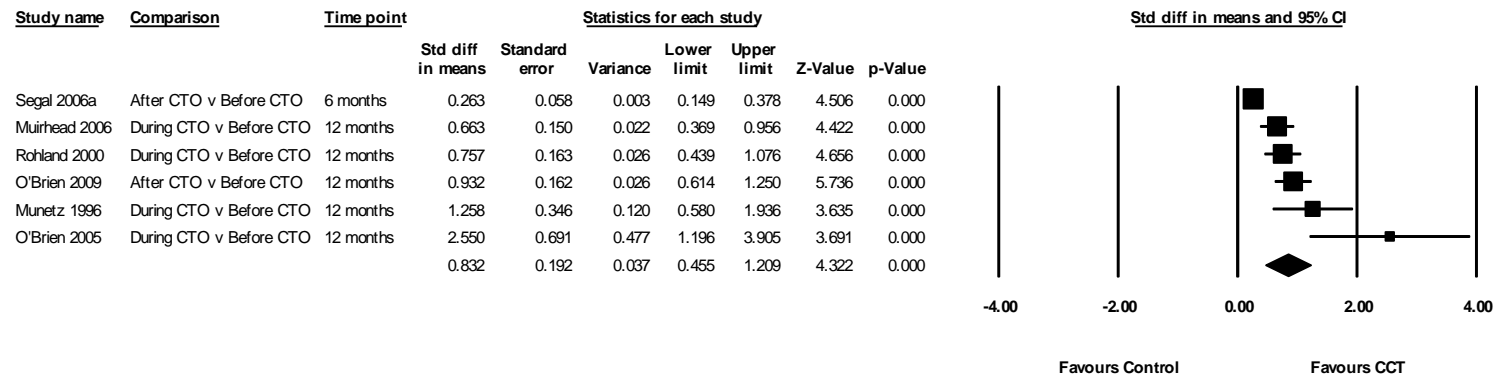

Pre-Post CCT

## Meta-analysis: Use of community services

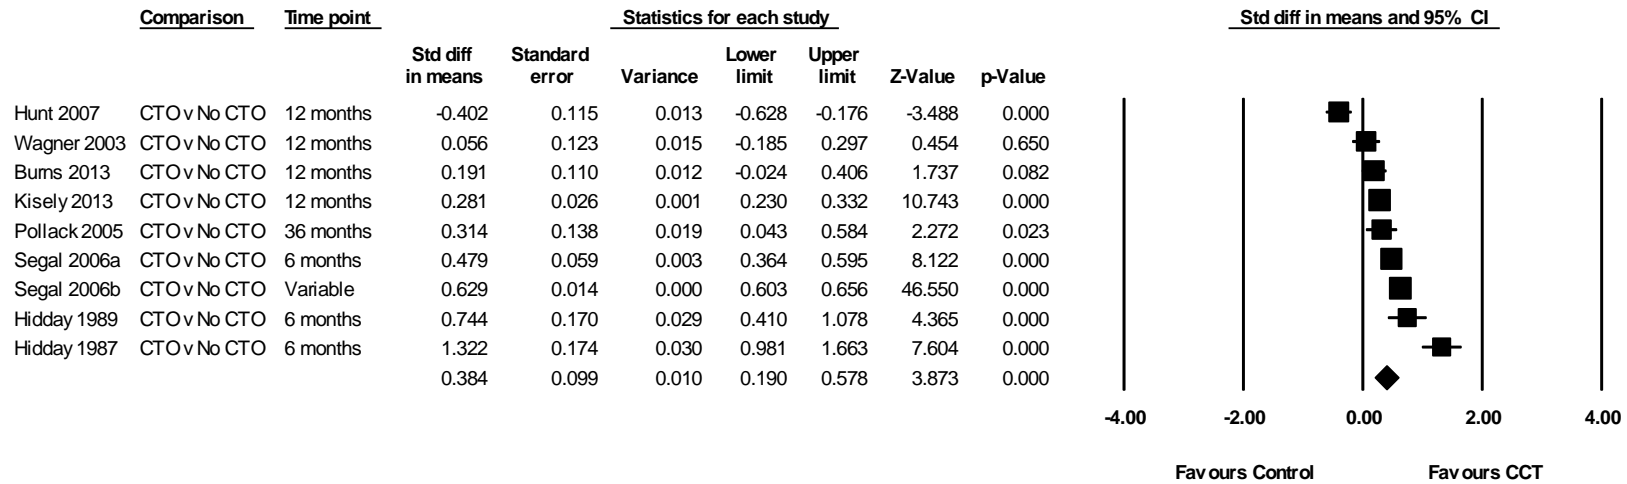

**CCT vs Control**

# Meta-analysis: Treatment adherence

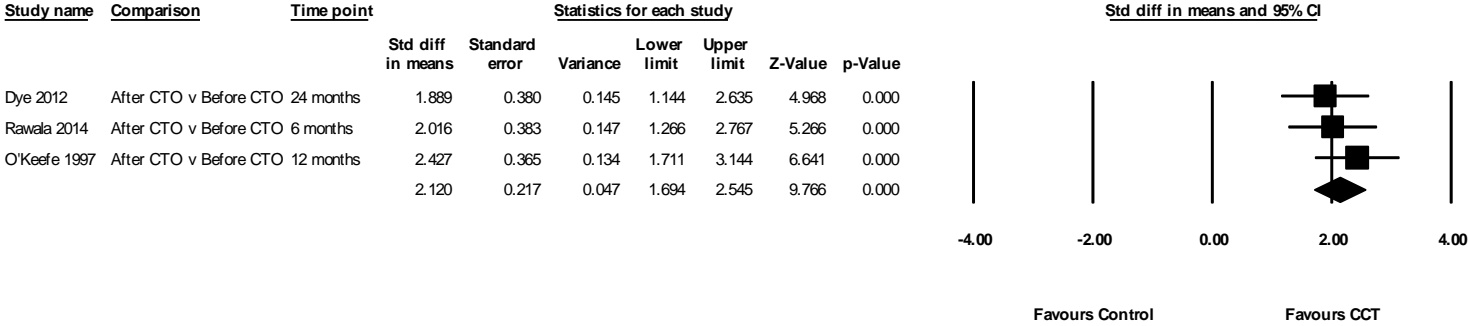

Pre-Post CCT

# Meta-analysis: Treatment adherence

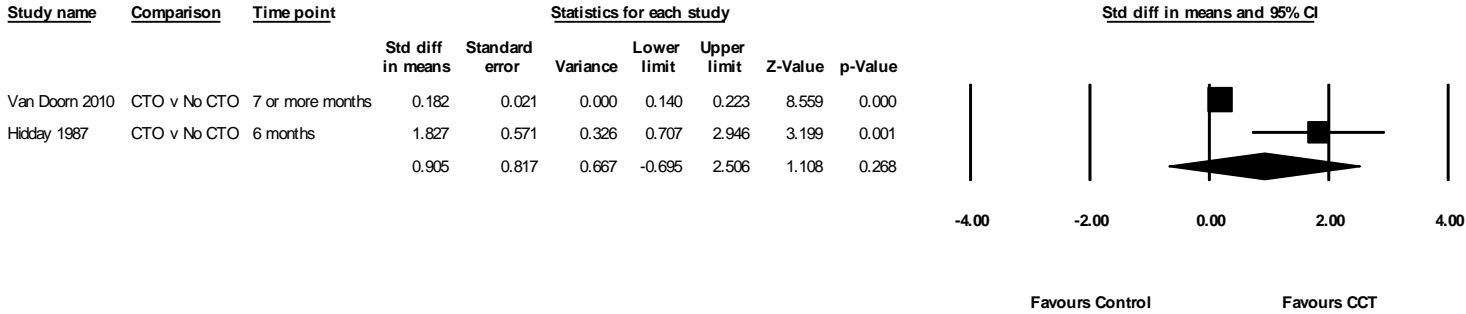

CCT vs Control

## Appendix 3

### *CCT-No CCT Comparison*

| <b>Outcome</b>            | <b>Studies Included</b> | <b>K</b> | <b>Effect Size <sup>a</sup></b> | <b>95% CI</b> | <b>p-value</b> | <b>Heterogeneity (I<sup>2</sup>)</b> |
|---------------------------|-------------------------|----------|---------------------------------|---------------|----------------|--------------------------------------|
| Readmission to Hospital   | Both                    | 17       | -0.14                           | -0.41,0.14    | .3358          | 98.06                                |
|                           | RCT                     | 3        | -0.08                           | -0.26,0.41    | .6542          | 69.86                                |
|                           | Non-randomised          | 14       | -0.18                           | -0.49,0.12    | .2418          | 98.33                                |
| Inpatient bed days        | Both                    | 11       | 0.13 <sup>a</sup>               | -0.08, 0.34   | .2335          | 97.18                                |
|                           | RCT                     | 2        | 0.25 <sup>a</sup>               | -0.11, 0.61   | .1805          | 70.11                                |
|                           | Non-randomised          | 9        | 0.10 <sup>a</sup>               | -0.14, 0.33   | .4112          | 97.65                                |
| Use of community services | Both                    | 9        | 0.38 <sup>a</sup>               | 0.19, 0.58    | .0001          | 96.92                                |
|                           | RCT                     | 2        | 0.13                            | -0.03,0.29    | .1099          | 0                                    |
|                           | Non-randomised          | 7        | 0.46 <sup>a</sup>               | 0.24, 0.67    | <.0001         | 97.44                                |

<sup>a</sup>Standard Difference In Means

### Regression of Std diff in means on year of publication

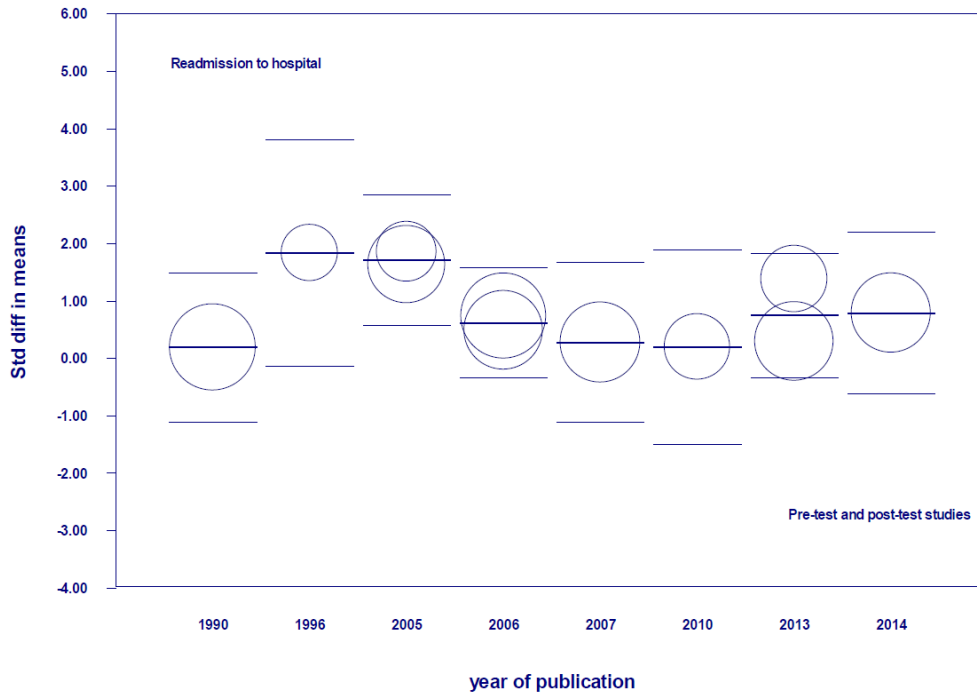

### Regression of Std diff in means on year of publication

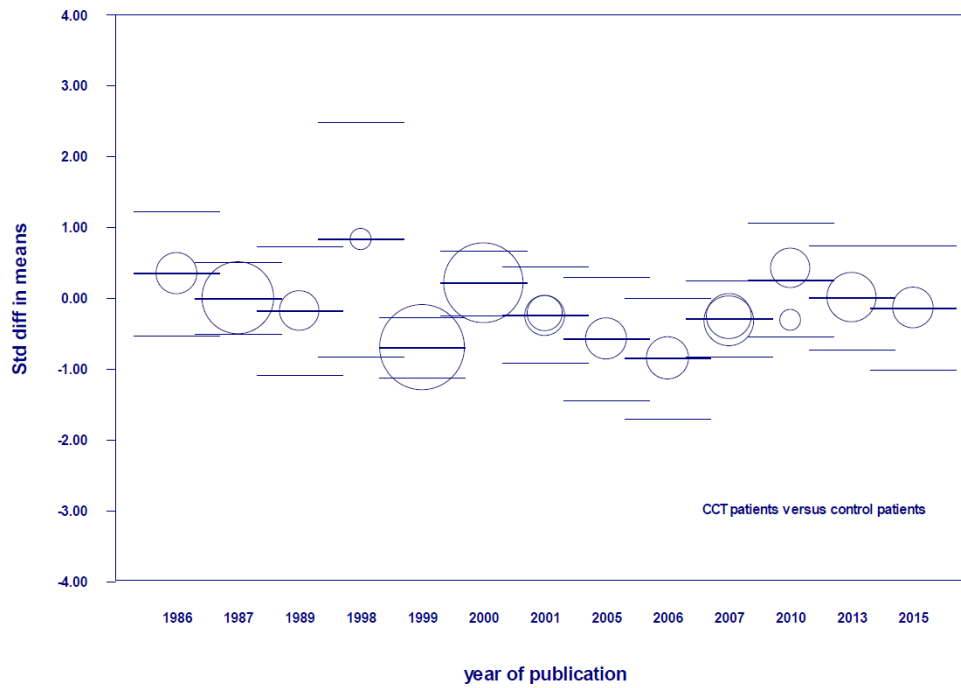

### Regression of Std diff in means on duration of follow-up

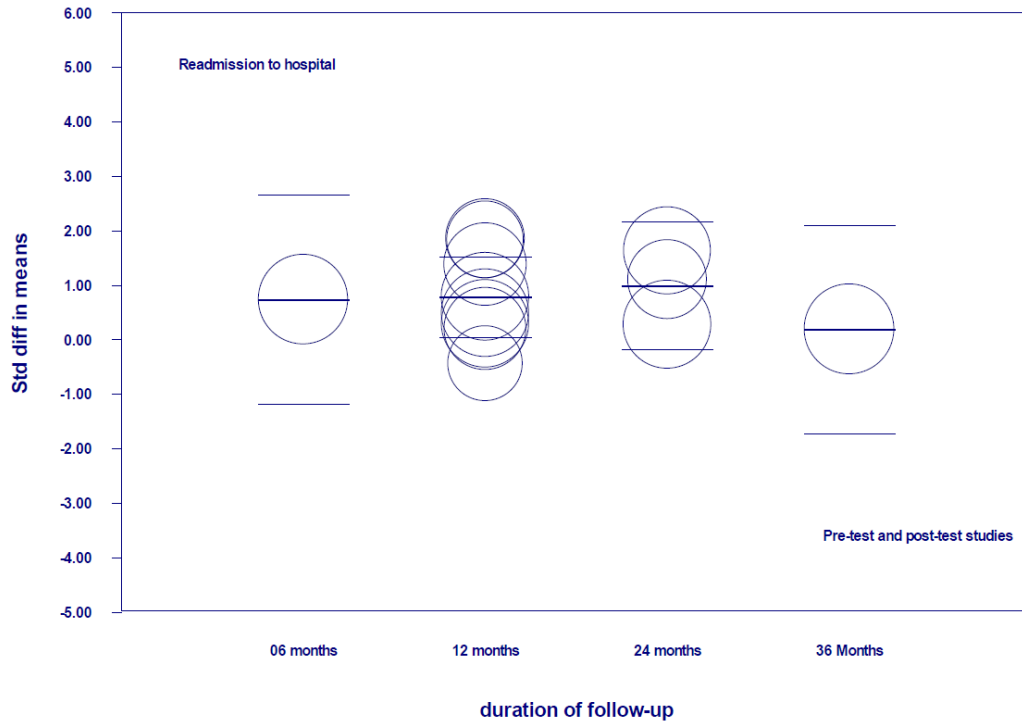

### Regression of Std diff in means on duration of follow-up

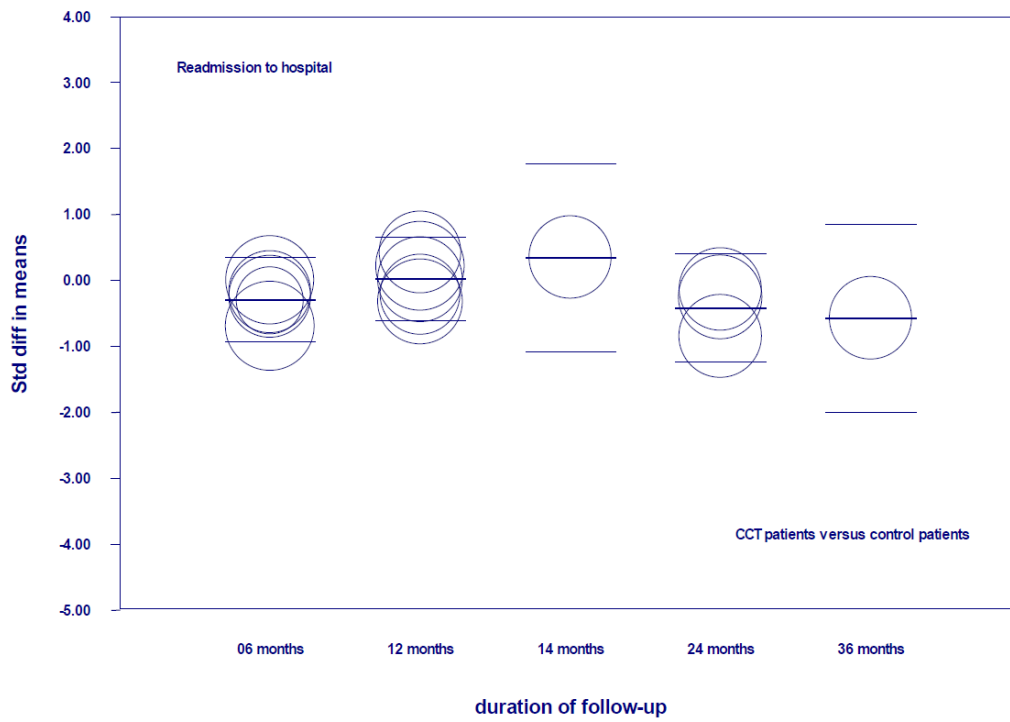

### Regression of Std diff in means on country

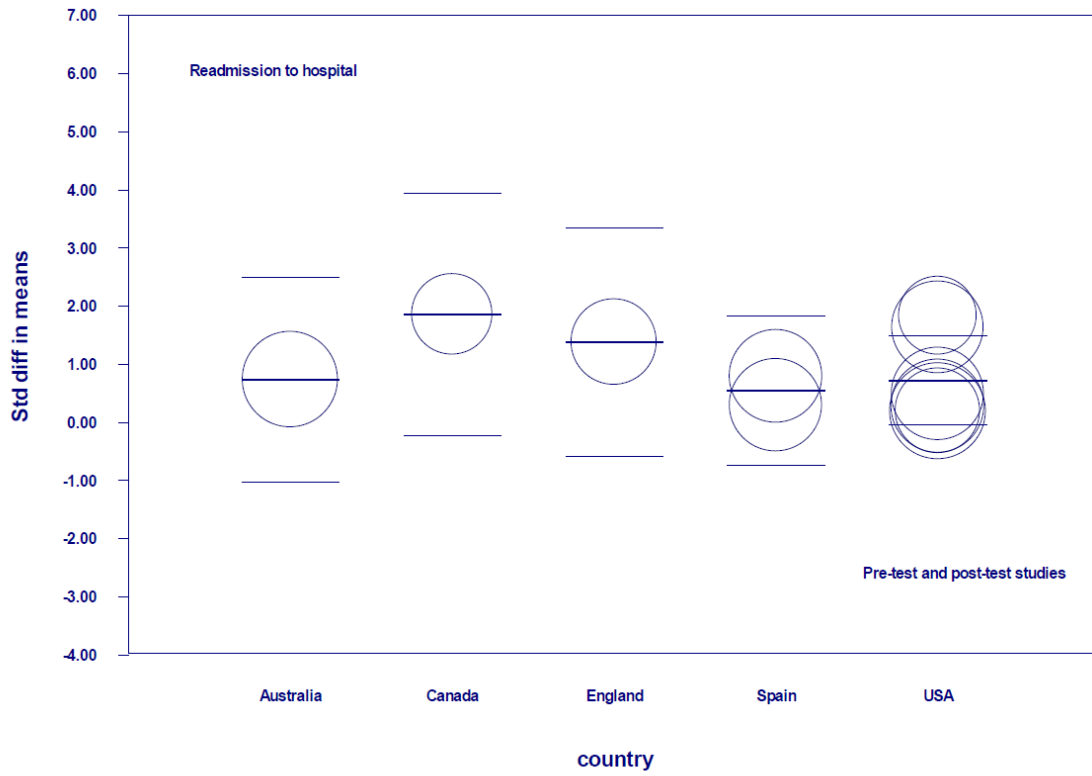

### Regression of Std diff in means on country

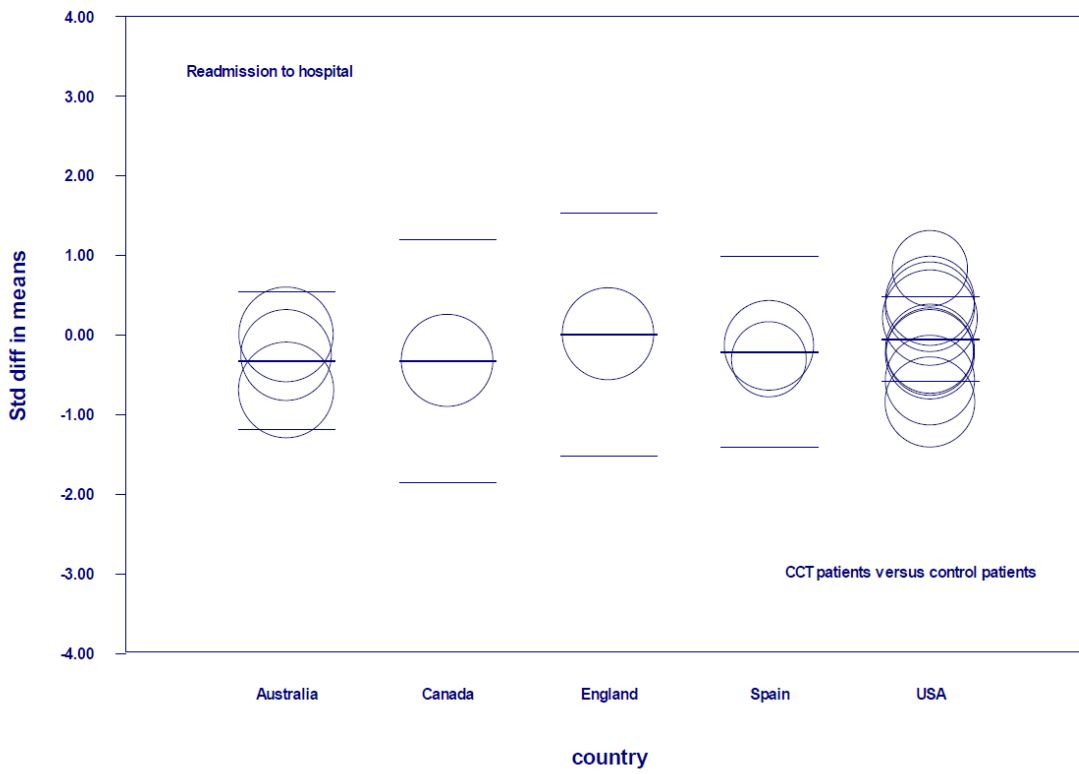



### Regression of Std diff in means on study quality

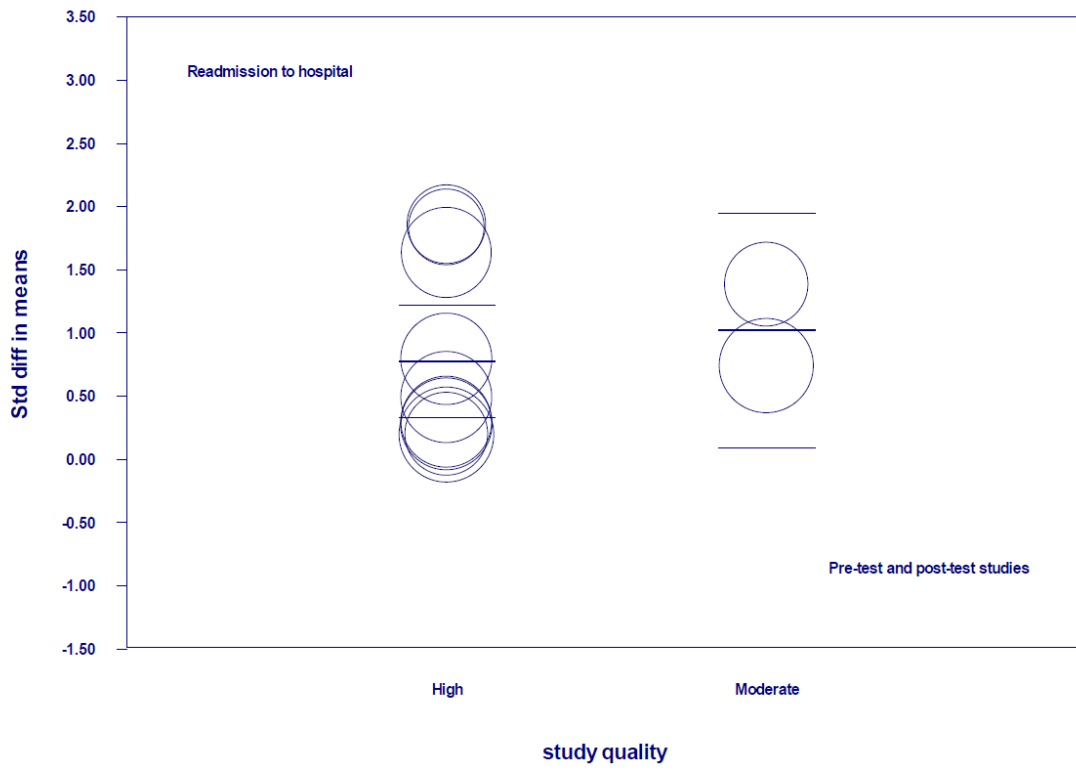

### Regression of Std diff in means on study quality

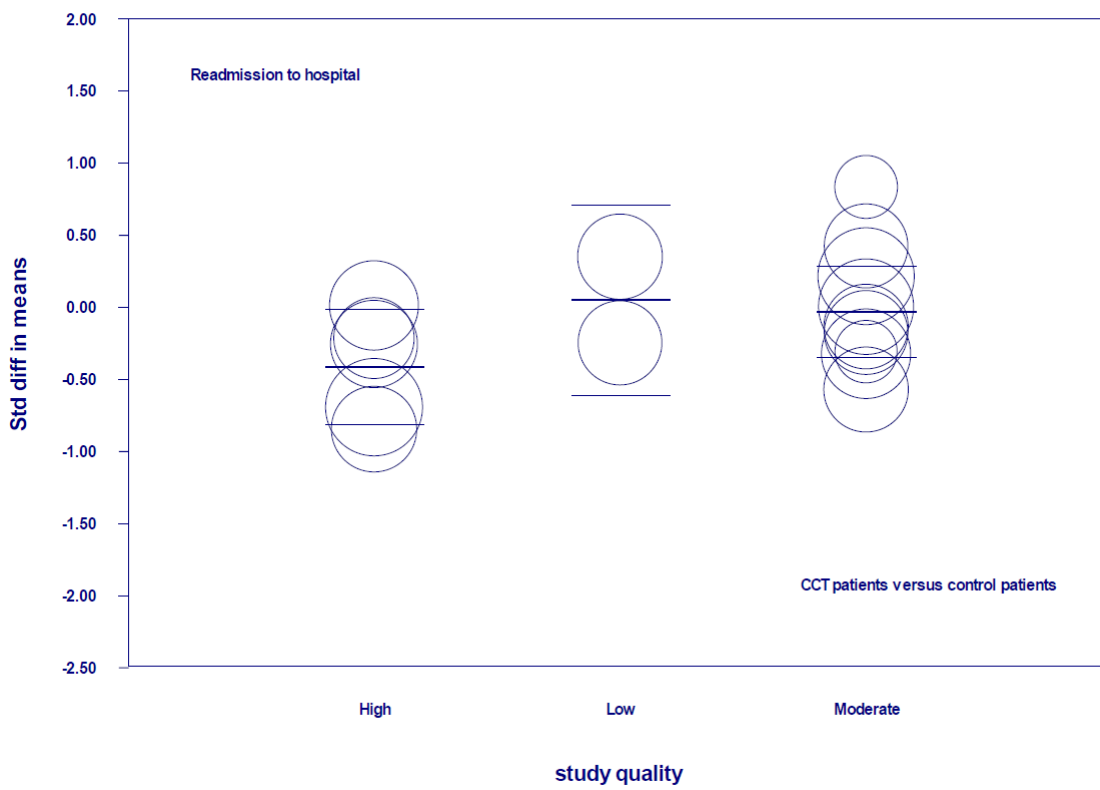

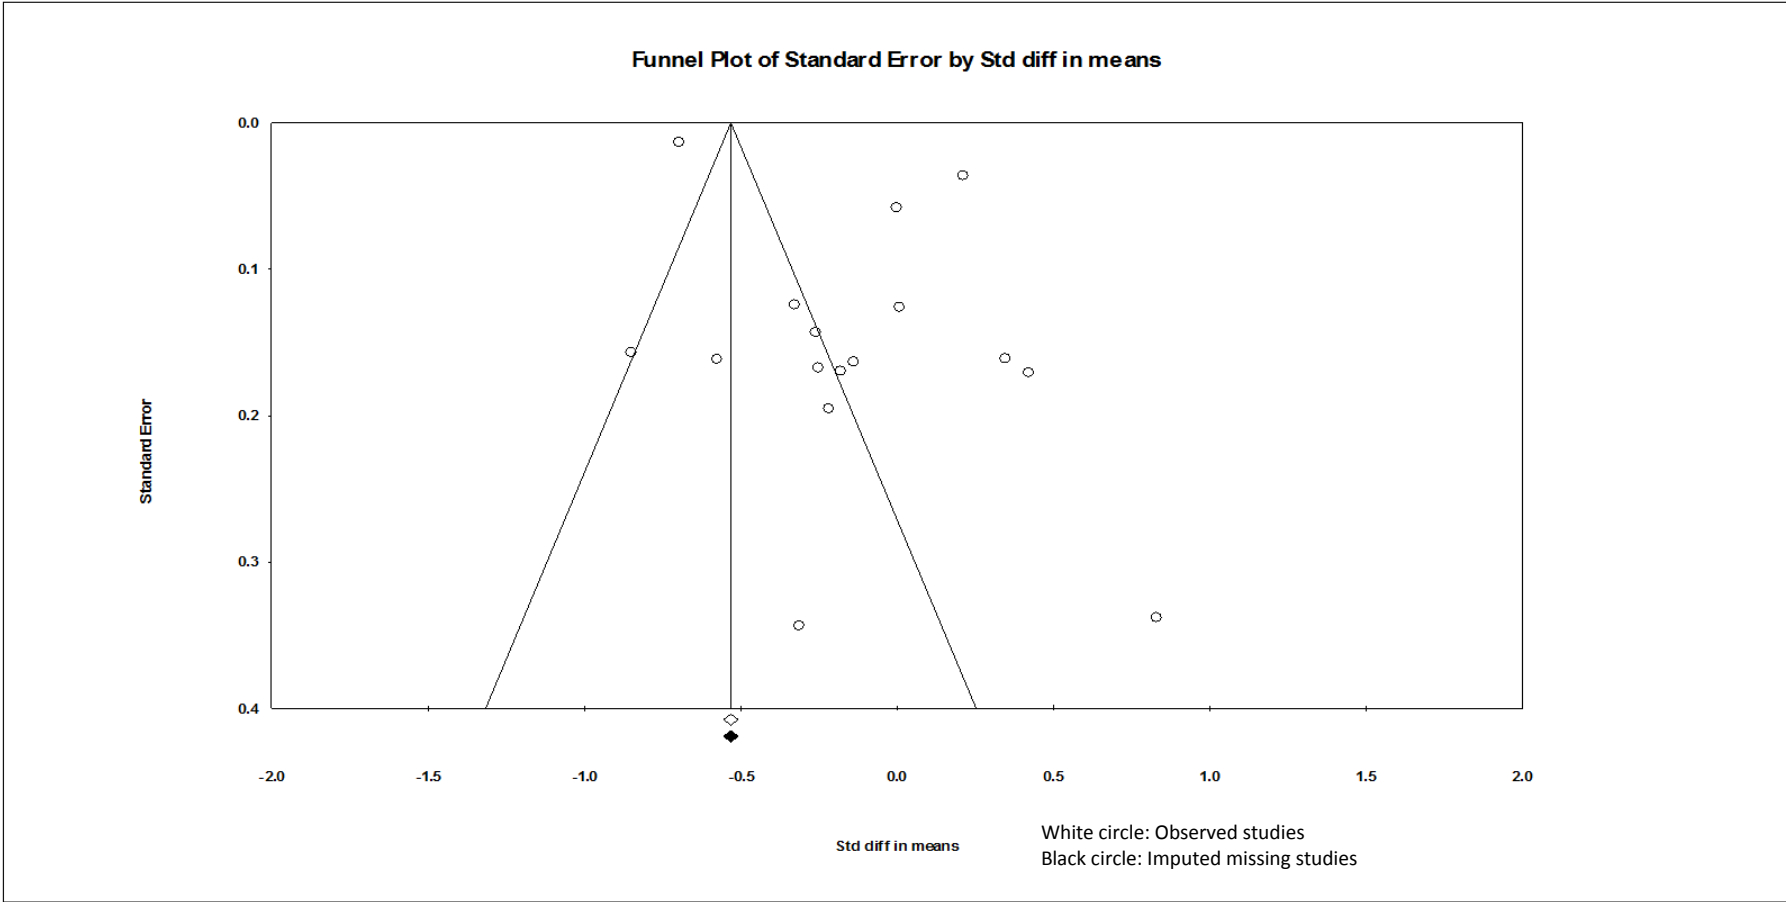

Readmission, CCT vs no CCT

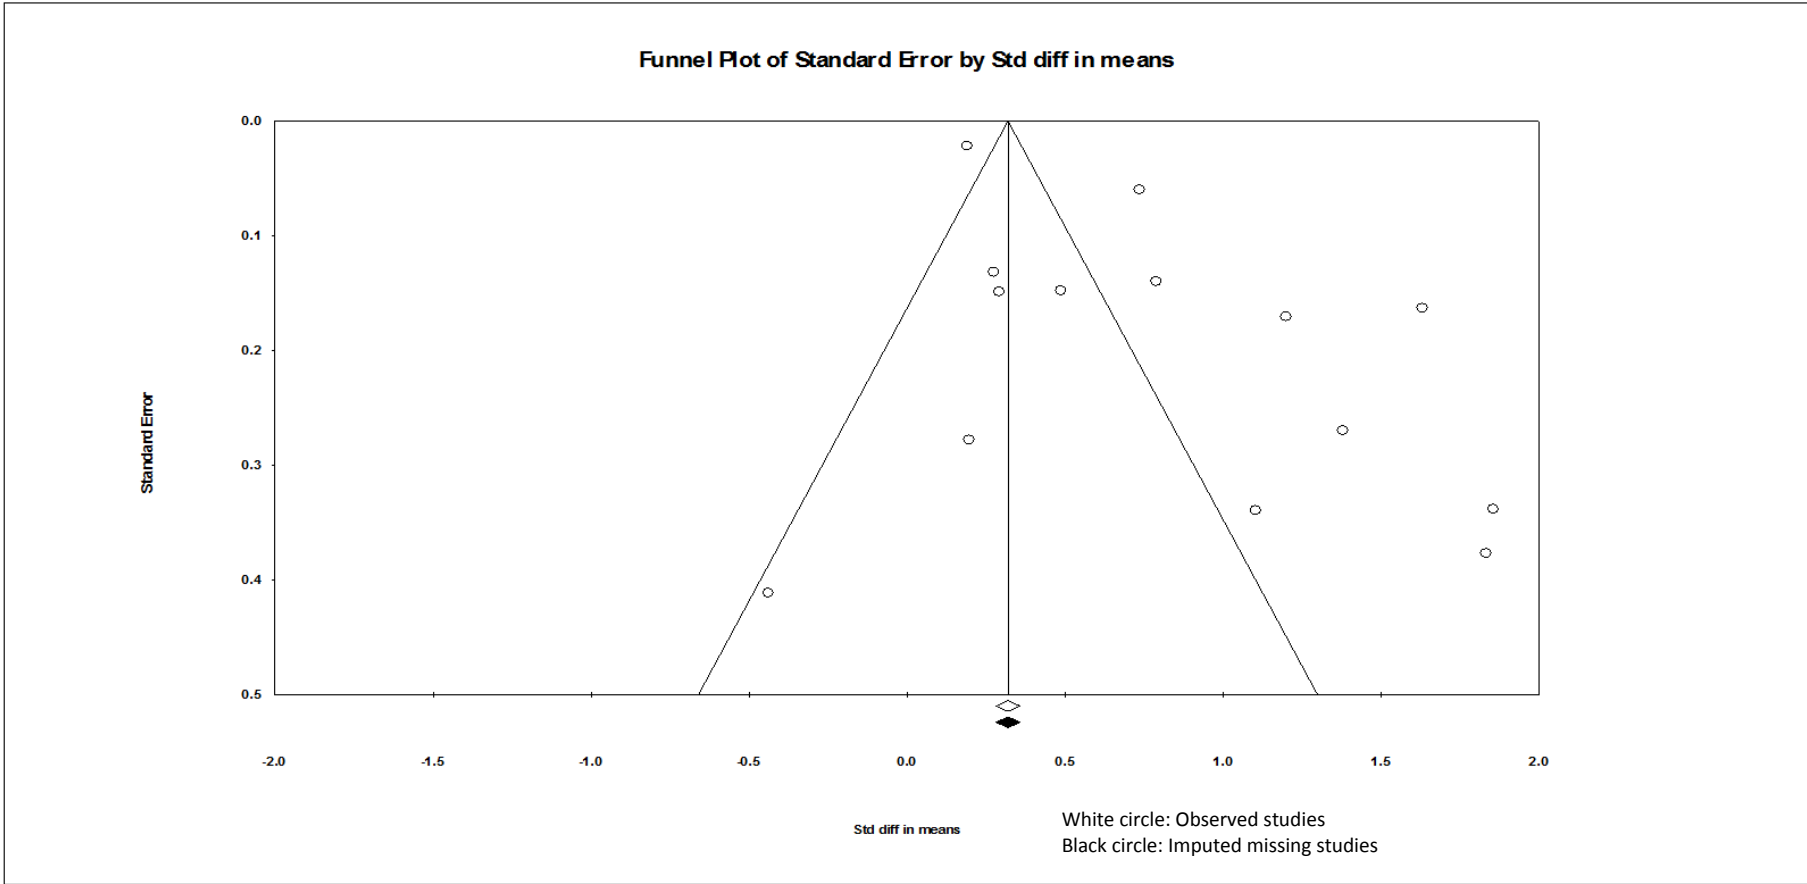

Readmission, Pre-Post designs

Funnel Plot of Standard Error by Std diff in means

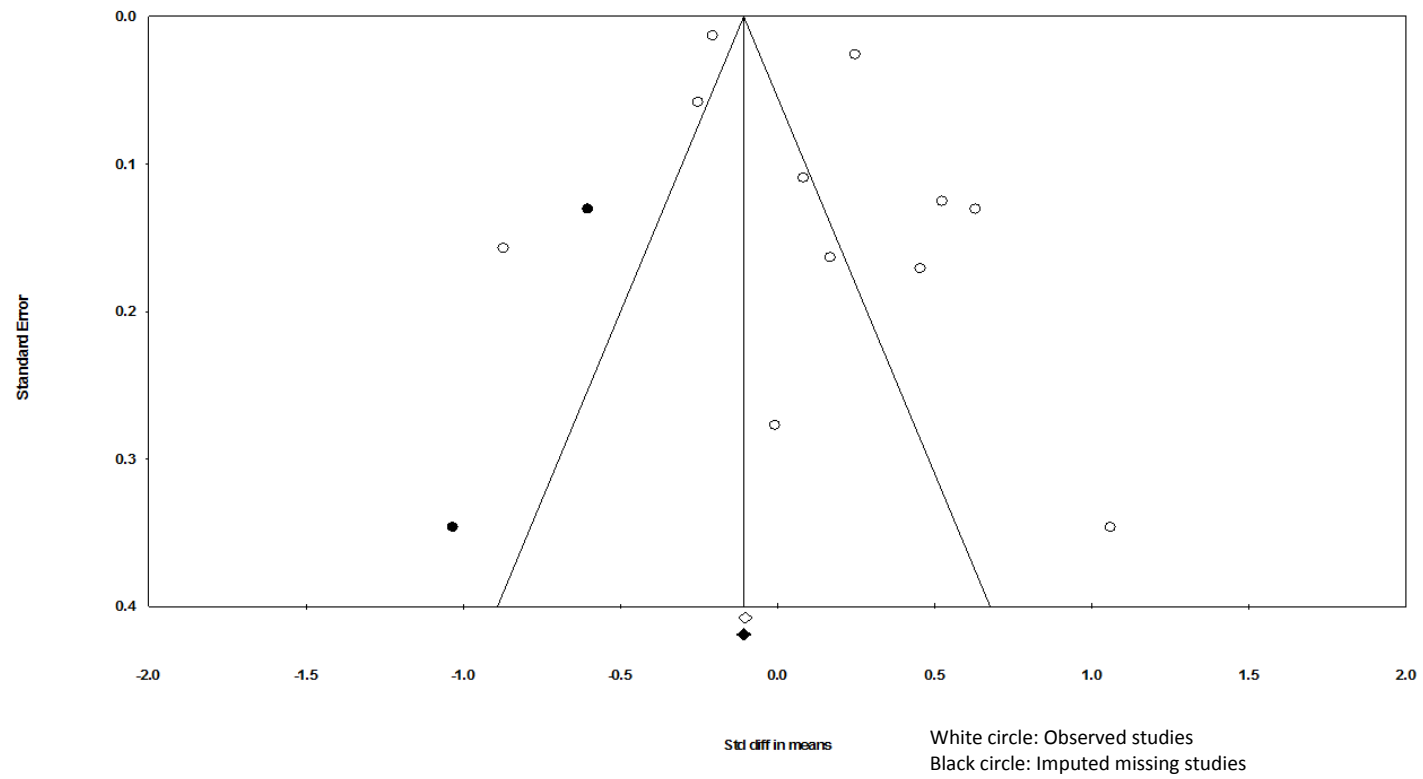

Inpatient bed days, CCT v no CCT

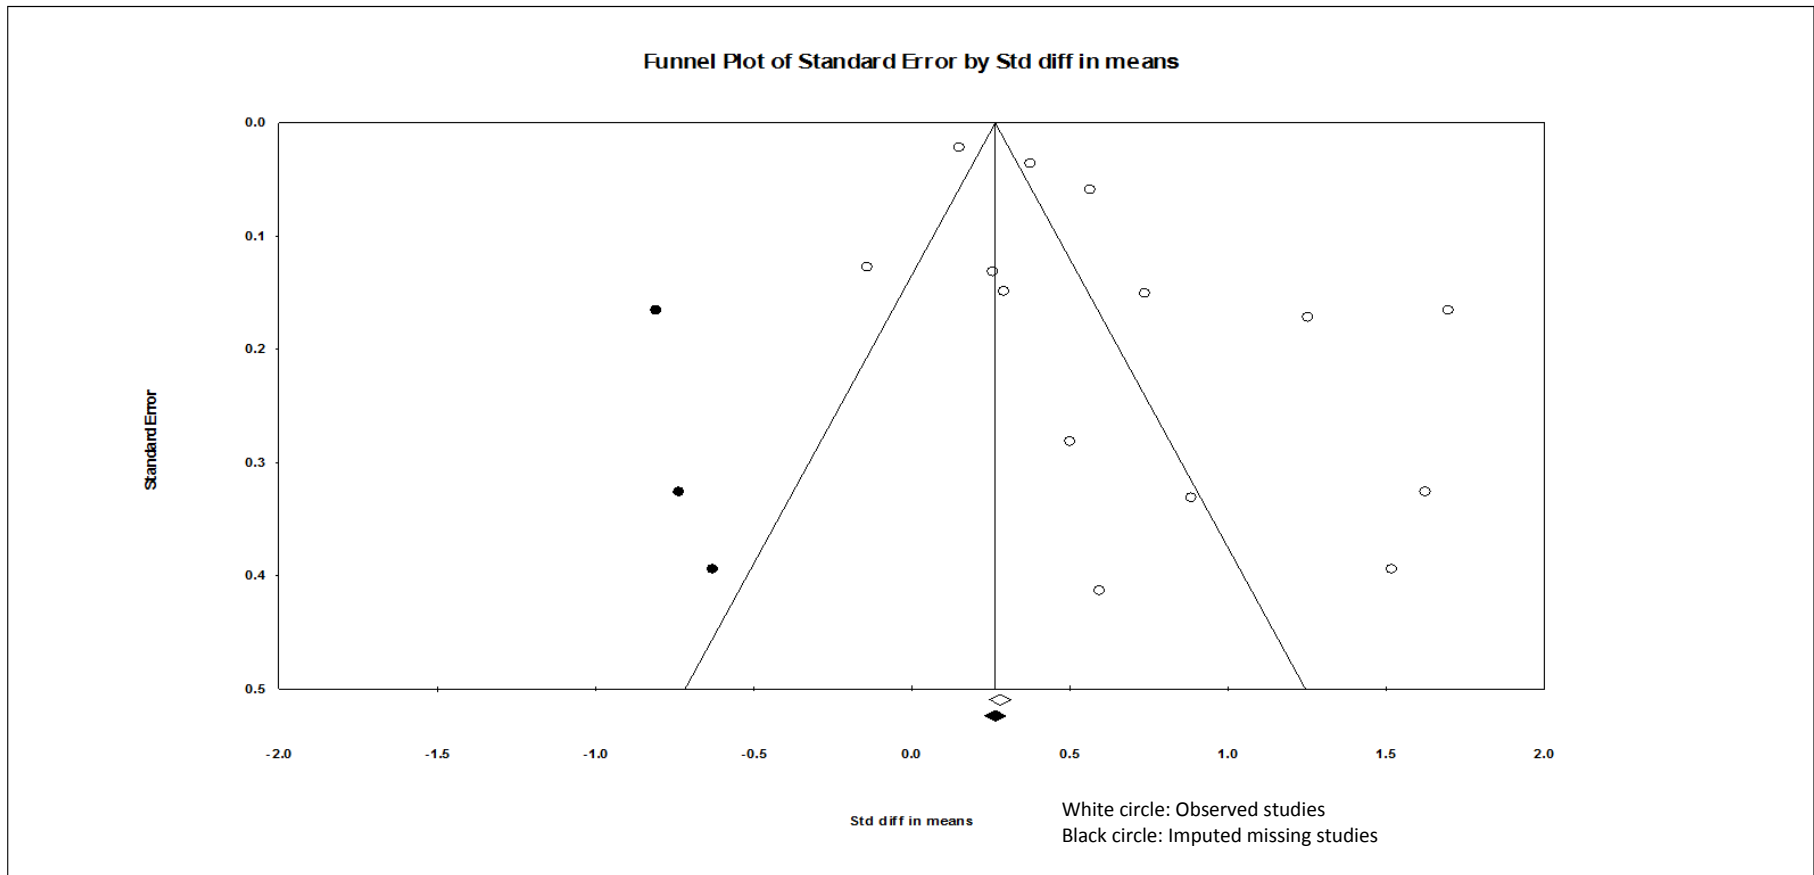

Inpatient bed days, Pre-Post designs

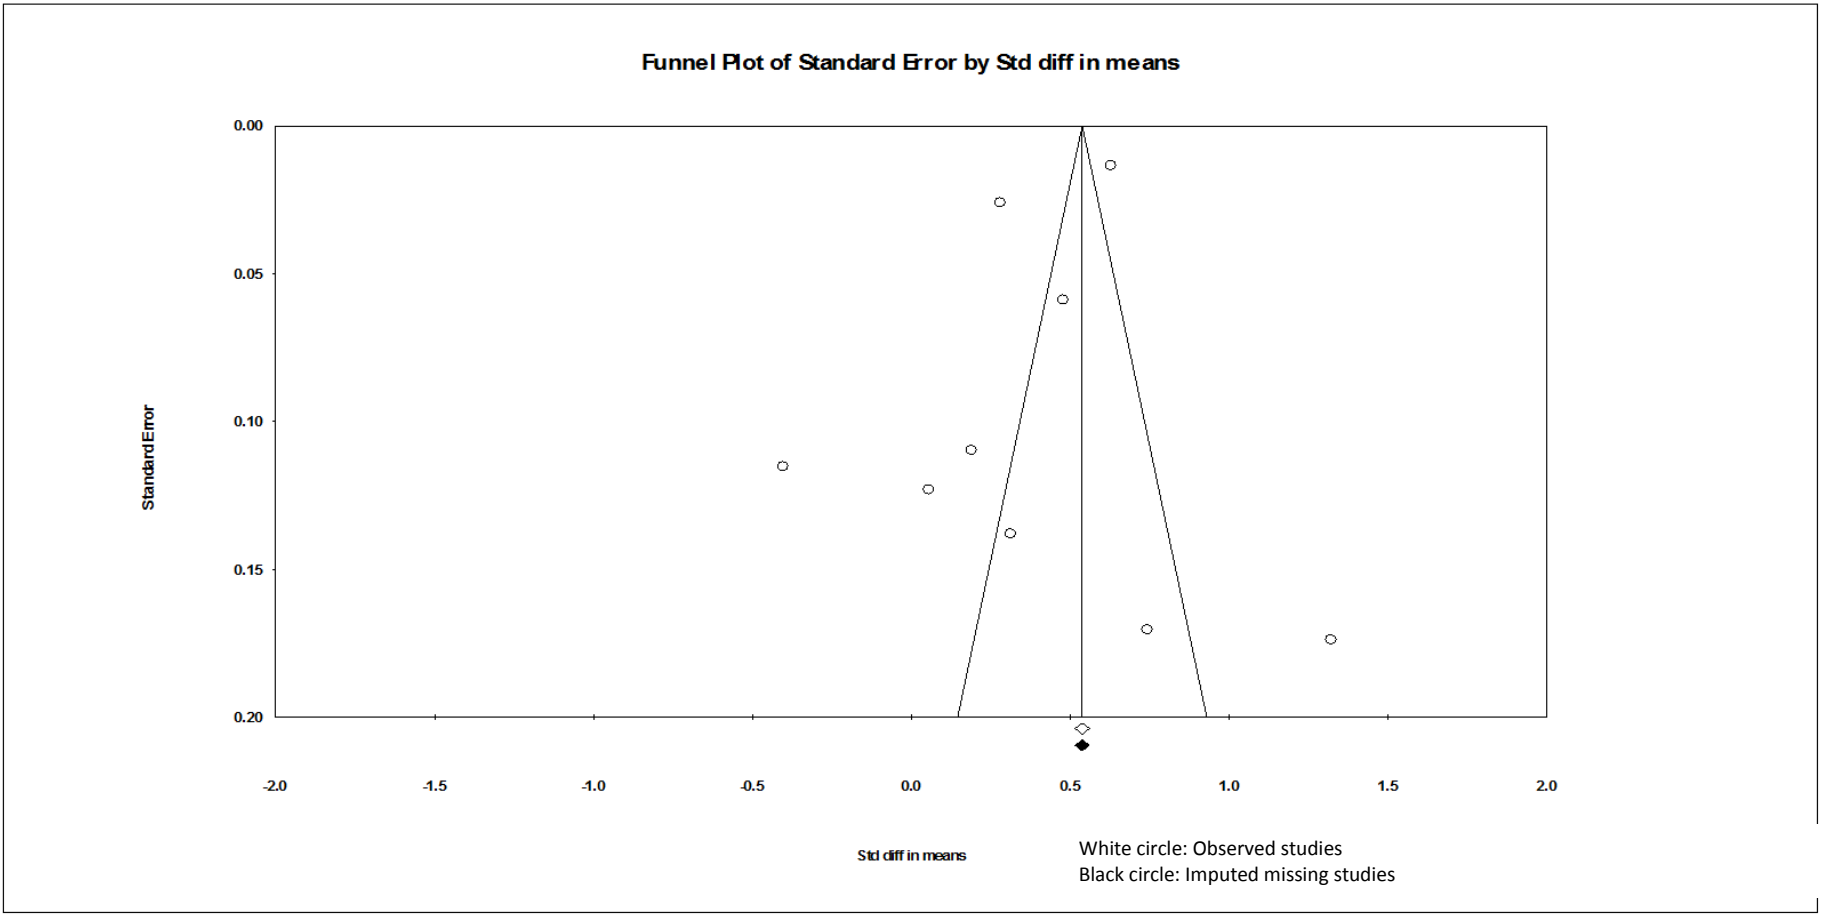

Use of community services, CCT vs no CCT

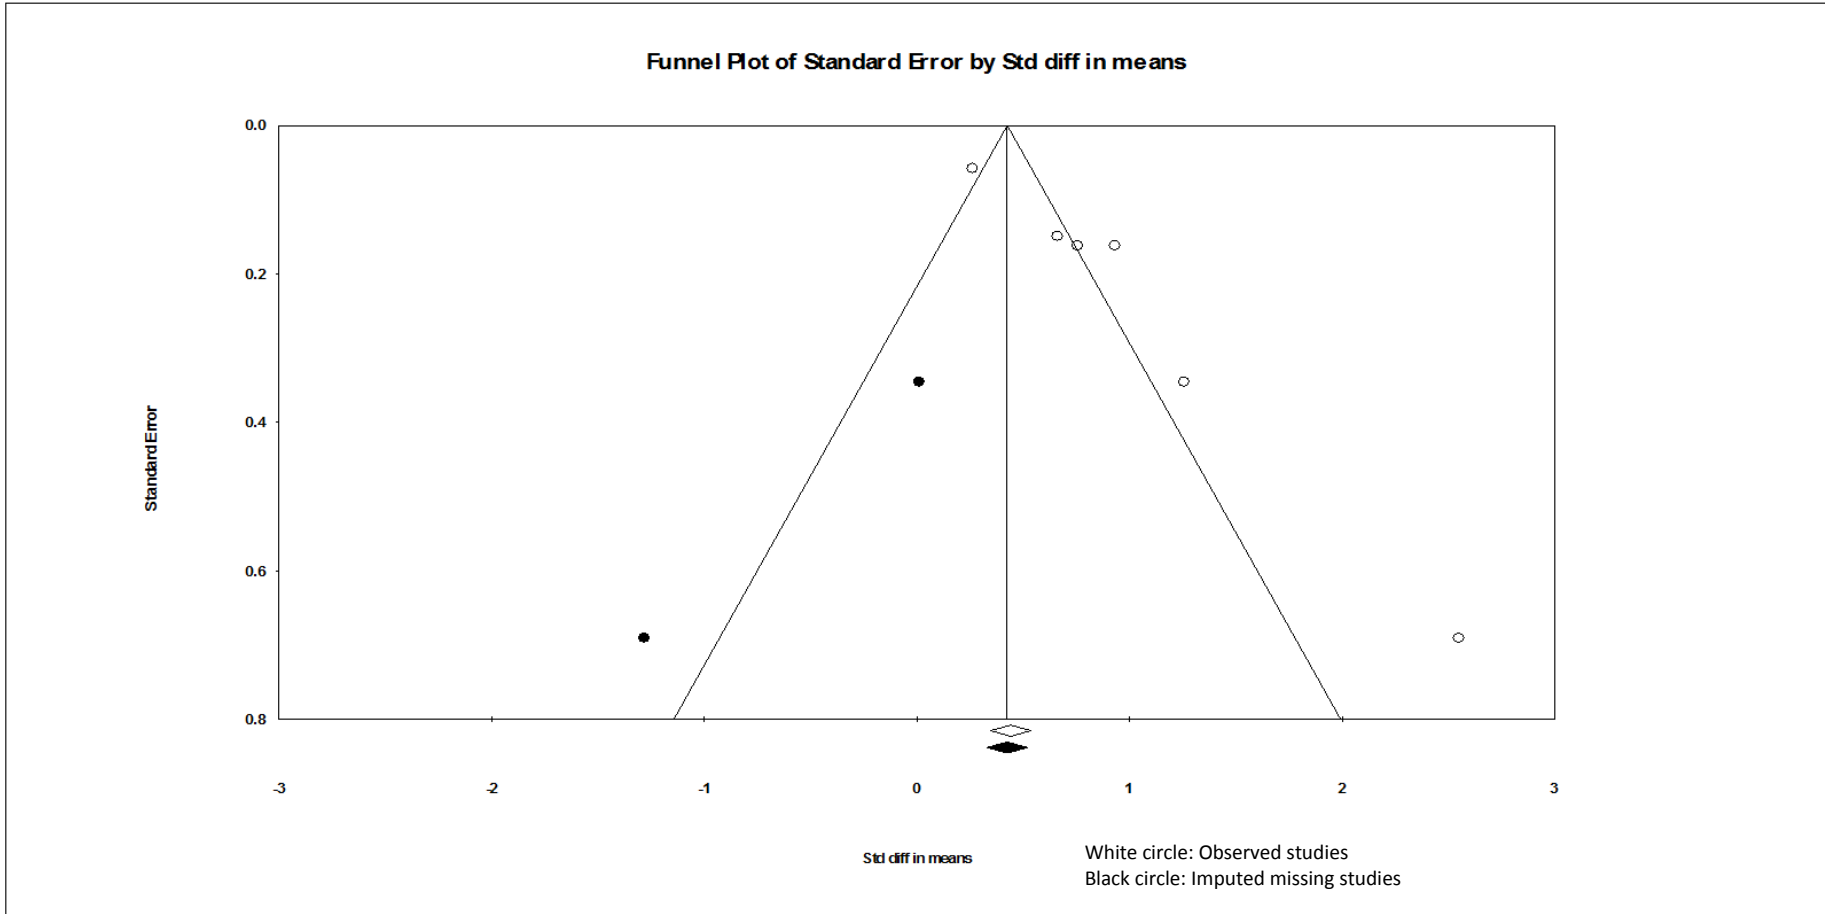

Use of community services, Pre-post designs

Treatment adherence, CCT vs no CCT-insufficient data.



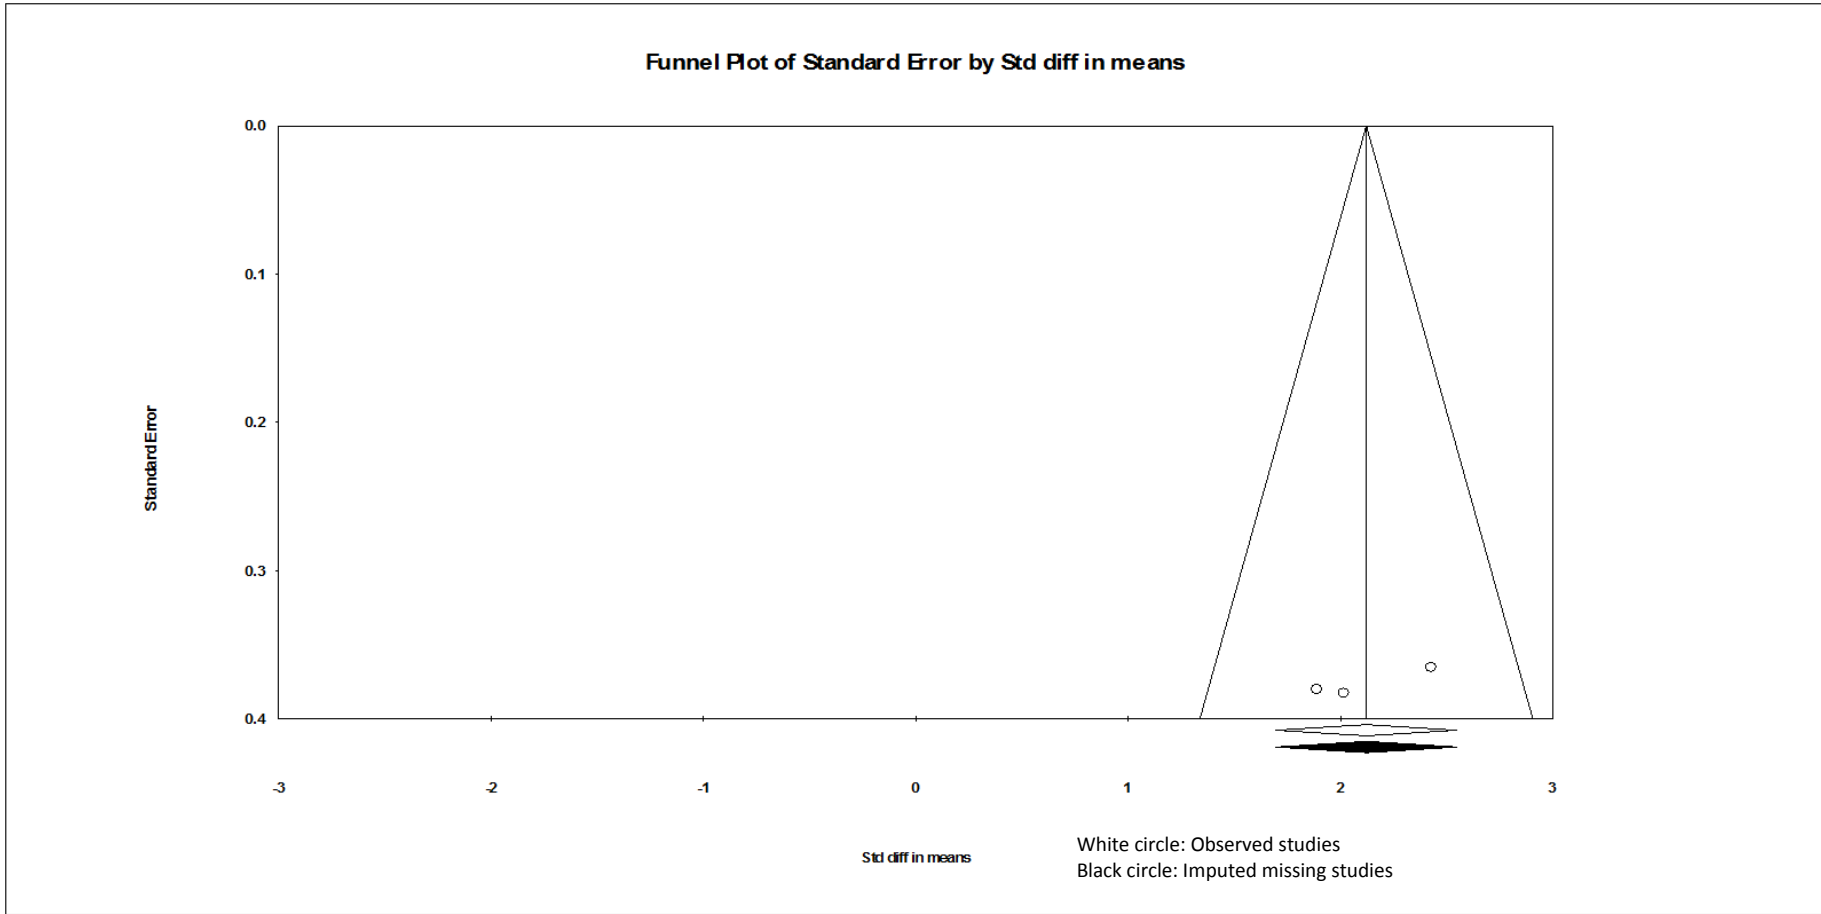

Treatment adherence, Pre-post designs
